# Supplementary material
Source: PubMed Central journal article supplement (PMC10071507)
Supplement: NIHMS1879657-supplement-Appendix_A__Supplementary_data.pdf [file NIHMS1879657-supplement-Appendix_A__Supplementary_data.pdf]

**Table 2: Mean Rating of Drug Effects**

|                                                   | Pbo            | Heroin         | Nx<br>0.3      | Bup<br>1.51   | Bup<br>2.16   | Bup<br>6.16    | Bup<br>8.64    | Bup/Nx<br>1.51/1.44 | Bup/Nx<br>2.16/.61 | Bup/Nx<br>6.15/1.71 | Bup/Nx<br>8.64/2.44 |
|---------------------------------------------------|----------------|----------------|----------------|---------------|---------------|----------------|----------------|---------------------|--------------------|---------------------|---------------------|
| <b>Visual Analog Scale: Mean Peak 0-100 (SEM)</b> |                |                |                |               |               |                |                |                     |                    |                     |                     |
| <b>Anxious</b>                                    | 34.0<br>(11.6) | 15.9<br>(5.8)  | 30.1<br>(10.0) | 26.2<br>(9.7) | 25.0<br>(7.8) | 13.8<br>(4.8)  | 24.6<br>(10.4) | 19.5<br>(7.8)       | 23.5<br>(8.6)      | 47.8<br>(10.4)      | 32.7<br>(9.4)       |
| <b>Bad</b>                                        | 13.5<br>(6.5)  | 8.5<br>(5.7)   | 52.6<br>(12.6) | 14.5<br>(8.9) | 11.7<br>(5.6) | 10.0<br>(4.6)  | 12.3<br>(7.7)  | 45.3<br>(11.6)      | 58.5<br>(10.4)     | 58.2<br>(12.5)      | 73.2<br>(10.5)      |
| <b>Good</b>                                       | 24.0<br>(7.0)  | 42.0<br>(11.0) | 13.0<br>(7.0)  | 18.0<br>(7.0) | 19.0<br>(9.0) | 34.0<br>(10.0) | 40.0<br>(9.0)  | 8.0<br>(5.0)        | 17.0<br>(9.0)      | 14.0<br>(7.0)       | 22.0<br>(9.0)       |
| <b>High</b>                                       | 12.8<br>(4.9)  | 51.2<br>(11.2) | 27.8<br>(10.5) | 19.8<br>(7.5) | 18.5<br>(9.4) | 38.2<br>(11.4) | 24.3<br>(9.0)  | 10.2<br>(5.2)       | 25.1<br>(11.1)     | 20.5<br>(10.5)      | 15.2<br>(6.5)       |
| <b>Liked the Choice</b>                           | 17.7<br>(7.8)  | 40.7<br>(11.2) | 8.3<br>(7.2)   | 27.0<br>(9.3) | 27.3<br>(8.8) | 23.4<br>(8.9)  | 25.8<br>(9.3)  | 4.8<br>(4.0)        | 12.2<br>(7.5)      | 14.2<br>(9.0)       | 18.2<br>(7.7)       |
| <b>Nauseated</b>                                  | 12.0<br>(7.2)  | 10.2<br>(5.9)  | 35.6<br>(9.8)  | 7.1<br>(6.4)  | 3.5<br>(1.7)  | 5.0<br>(2.6)   | 13.4<br>(7.8)  | 25.5<br>(10.2)      | 30.5<br>(9.7)      | 24.1<br>(9.5)       | 39.2<br>(9.4)       |
| <b>Potent</b>                                     | 15.7<br>(6.0)  | 42.8<br>(10.3) | 37.7<br>(11.4) | 22.5<br>(9.2) | 19.6<br>(9.9) | 34.9<br>(10.6) | 32.2<br>(8.8)  | 34.4<br>(11.4)      | 29.8<br>(9.9)      | 46.8<br>(13.4)      | 55.7<br>(11.2)      |
| <b>Would Pay</b>                                  | .46<br>(.27)   | 8.6<br>(2.0)   | 0.0<br>(0.0)   | 2.3<br>(.96)  | 2.9<br>(1.9)  | 5.7<br>(1.8)   | 4.2<br>(2.0)   | .15<br>(.15)        | .31<br>(.31)       | .62<br>(.62)        | 1.2<br>(.73)        |

**Drug Effects Questionnaire: Mean Peak 0-5 (SEM)**

|                   | Pbo          | Heroin       | Nx<br>0.3    | Bup<br>1.51  | Bup<br>2.16  | Bup<br>6.16  | Bup<br>8.64  | Bup/Nx<br>1.51/.44 | Bup/Nx<br>2.16/.61 | Bup/Nx<br>6.15/1.71 | Bup/Nx<br>8.64/2.44 |
|-------------------|--------------|--------------|--------------|--------------|--------------|--------------|--------------|--------------------|--------------------|---------------------|---------------------|
| <b>Bad</b>        | .31<br>(.24) | .23<br>(.17) | 2.2<br>(.52) | .15<br>(.15) | .46<br>(.24) | .46<br>(.24) | .92<br>(.42) | 2.5<br>(.45)       | 2.2<br>(.44)       | 2.7<br>(.43)        | 3.0<br>(.39)        |
| <b>Good</b>       | .46<br>(.14) | 2.2<br>(.45) | .31<br>(.24) | .69<br>(.26) | .77<br>(.30) | 1.5<br>(.35) | 1.5<br>(.33) | .39<br>(.18)       | .54<br>(.22)       | .46<br>(.27)        | .46<br>(.31)        |
| <b>Like</b>       | .69<br>(.29) | 2.2<br>(.47) | 0.0<br>(0.0) | 1.1<br>(.35) | .77<br>(.36) | 1.8<br>(.36) | 1.4<br>(.35) | .08<br>(.08)       | .46<br>(.27)       | .31<br>(.24)        | .15<br>(.15)        |
| <b>Strong</b>     | .92<br>(.27) | 2.0<br>(.34) | 2.2<br>(.48) | 1.0<br>(.32) | .92<br>(.27) | 1.9<br>(.37) | 1.6<br>(.35) | 2.2<br>(.40)       | 2.4<br>(.40)       | 2.8<br>(.38)        | 2.7<br>(.37)        |
| <b>Take Again</b> | .85<br>(.32) | 2.1<br>(.46) | .23<br>(.17) | 1.1<br>(.37) | .92<br>(.45) | 1.8<br>(.43) | 1.2<br>(.32) | 0.0<br>(0.0)       | .39<br>(.21)       | .23<br>(.17)        | .39<br>(.27)        |

**Subjective Opioid Withdrawal Scale: Mean (SEM)**

|                  | Pbo          | Heroin       | Nx<br>0.3     | Bup<br>1.51  | Bup<br>2.16  | Bup<br>6.16  | Bup<br>8.64  | Bup/Nx<br>1.51/.44 | Bup/Nx<br>2.16/.61 | Bup/Nx<br>6.15/1.71 | Bup/Nx<br>8.64/2.44 |
|------------------|--------------|--------------|---------------|--------------|--------------|--------------|--------------|--------------------|--------------------|---------------------|---------------------|
| <b>Sum Score</b> | 8.3<br>(2.7) | 4.9<br>(1.0) | 24.6<br>(5.8) | 6.2<br>(2.5) | 3.7<br>(0.7) | 4.7<br>(1.2) | 4.9<br>(1.9) | 16.7<br>(3.3)      | 20.2<br>(4.8)      | 19.9<br>(2.8)       | 29.2<br>(4.3)       |

**Pupil Diameter: Mean (SEM)**

|                    |              |              |              |              |              |               |              |              |              |              |              |
|--------------------|--------------|--------------|--------------|--------------|--------------|---------------|--------------|--------------|--------------|--------------|--------------|
| <b>Trough (mm)</b> | 3.1<br>(.05) | 2.2<br>(.08) | 3.3<br>(.08) | 3.0<br>(.05) | 2.8<br>(.04) | 2.88<br>(.02) | 2.8<br>(.03) | 3.1<br>(.07) | 3.2<br>(.08) | 2.9<br>(.01) | 3.0<br>(.07) |
|--------------------|--------------|--------------|--------------|--------------|--------------|---------------|--------------|--------------|--------------|--------------|--------------|
